# Supplementary material
Source: MDPI journal article supplement (https://www.mdpi.com/2227-9717/9/6/942)
Supplement: s1 [file s1]

# Design of Polymer-Embedded Heterogeneous Fenton Catalysts for the Conversion of Organic Trace Compounds

Christoph Horn <sup>1,2</sup>, Stephanie Ihmann <sup>1,2</sup>, Felix Müller <sup>1</sup>, Doris Pospiech <sup>1,\*</sup>, Konstantin B. L. Borchert <sup>1,3</sup>, Rolf Hommel <sup>4</sup>, Kaite Qin <sup>4</sup>, Kai Licha <sup>5</sup>, Peter J. Allertz <sup>6</sup> and Marco Drache <sup>7</sup>

<sup>1</sup> Leibniz-Institut für Polymerforschung Dresden e.V., Hohe Str. 6, 01069 Dresden, Germany; horn-christoph@ipfdd.de (C.H.); ihmman@ipfdd.de (S.I.); muellerfelix@freenet.de (F.M.); borchert@ipfdd.de (K.B.L.B.)

<sup>2</sup> Organic Chemistry of Polymers, Technische Universität Dresden, 01069 Dresden, Germany

<sup>3</sup> Physical Chemistry of Polymeric Materials, Technische Universität Dresden, 01069 Dresden, Germany

<sup>4</sup> IFN Forschungs-und Technologiezentrum GmbH, Dr.-Bergius-Str. 19, 06729 Tröglitz-Elsteraue, Germany; R.Hommel@ifn-FTZ.de (R.H.); K.Qin@ifn-FTZ.de (K.Q.)

<sup>5</sup> FEW Chemicals GmbH, Technikumstr. 1, 06766 Bitterfeld-Wolfen, Germany; kai.lich@few.de

<sup>6</sup> Faculty of Natural Science, Brandenburg University of Technology, Universitätsplatz 1, 01968 Senftenberg, Germany; allertz@b-tu.de

<sup>7</sup> Institut für Technische Chemie, Technische Universität Clausthal, Arnold-Sommerfeld-Str. 4, 38678 Clausthal-Zellerfeld, Germany; marco.drache@tu-clausthal.de

\* Correspondence: pospiech@ipfdd.de; Tel.: +49-351-465-8497

## Supporting Information

1. WAXS diffraction patterns of F1 and F2
2. N<sub>2</sub> adsorption isotherms and pore size distribution
3. Scavenger effect on the RB5 degradation catalyzed by F2
4. Degradation kinetics of RB5 catalyzed by polymer composites with different iron contents

## 1. WAXS diffraction patterns of F1 and F2.

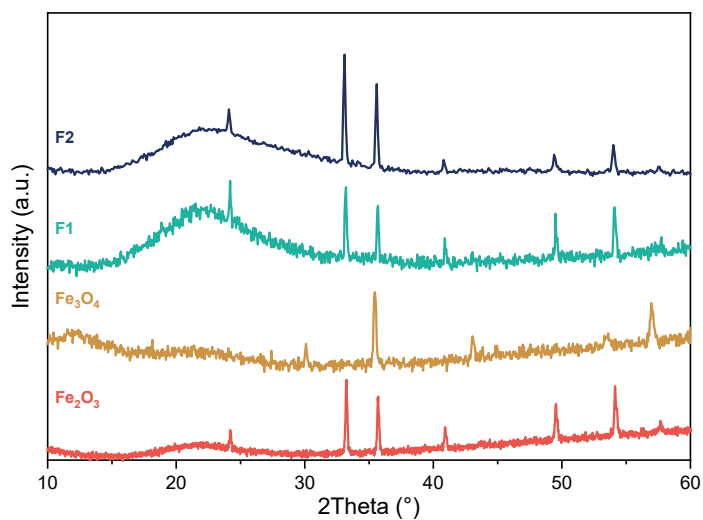

**Figure S1.** WAXS patterns of the Fenton catalysts F1 and F2 compared to  $\text{Fe}_2\text{O}_3$  and  $\text{Fe}_3\text{O}_4$ .

## 2. $\text{N}_2$ adsorption isotherms and pore size distribution

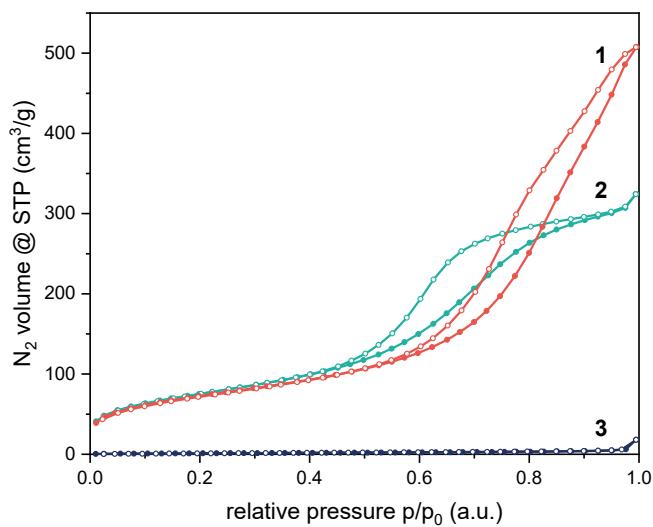

**Figure S2.** Isotherms for  $\text{N}_2$  adsorption (filled circles) and desorption (empty circles) of the samples (1) F2, (2) F1 and (3)  $\text{Fe}_2\text{O}_3$  at 77 K.

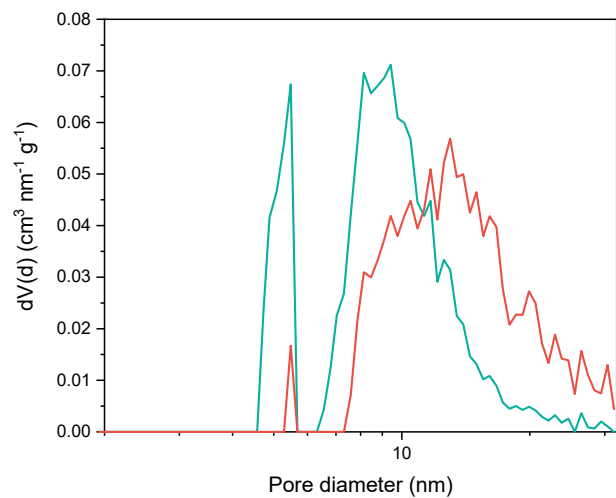

**Figure S3.** Pore size distribution (PSD) calculated by NLDFT fit (cylindrical/sphere pores, adsorption model, N<sub>2</sub> on silica) for F1 (red) and F2 (green).

### 3. Scavenger effect on the RB5 degradation catalyzed by F2

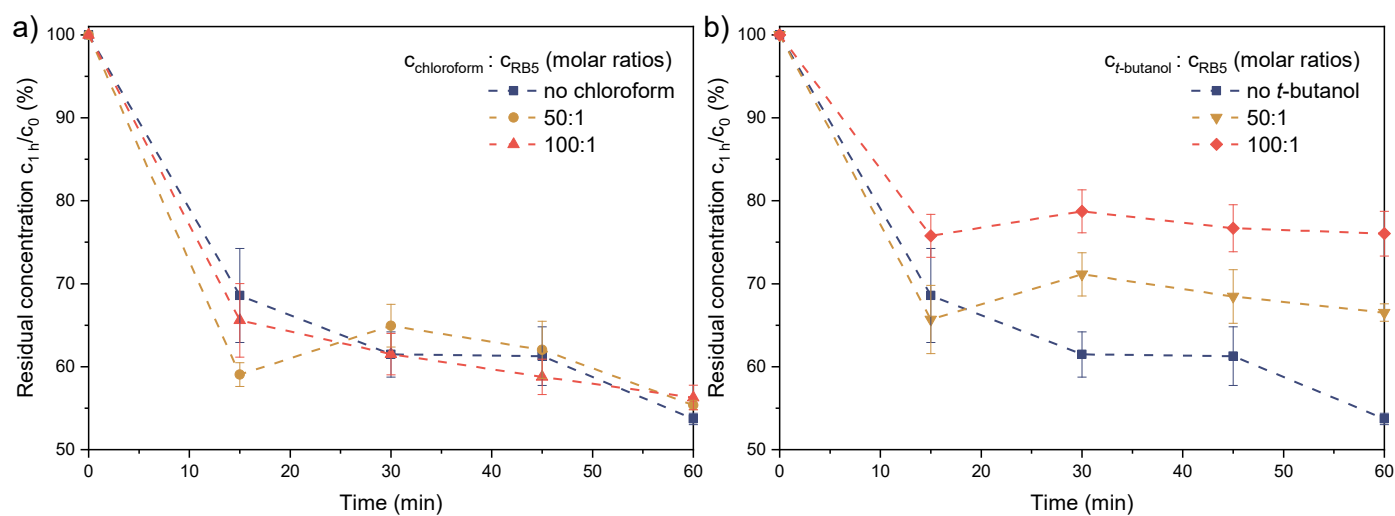

**Figure S4.** Effect of (a) O<sub>2</sub>•<sup>-</sup> scavenger chloroform and (b) OH• scavenger *t*-butanol on the degradation of RB5 catalyzed by the Fenton catalyst F2.

#### 4. Degradation kinetics of RB5 catalyzed by polymer composites with different iron contents

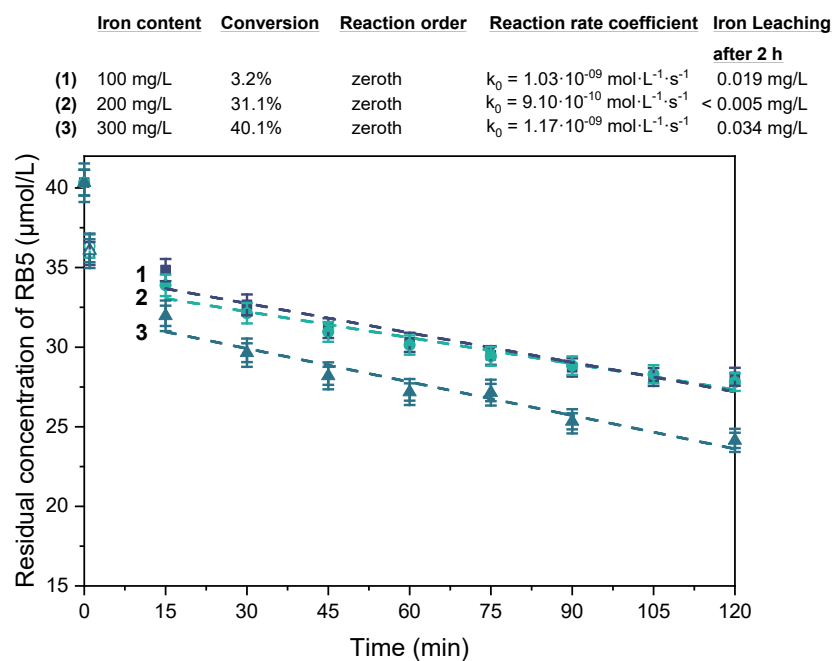

**Figure S5.** Kinetic study of RB5 degradation using the composite PP-g-MA-g-PEO1000/APTES/F2 (65/35) with different amount of iron per RB5 assay, (1) 100 mg/L iron, (2) 200 mg/L iron, (3) 300 mg/L iron.
